# Supplementary material for: Patient-oriented risk score for predicting death 1 year after myocardial infarction: the SweDen risk score
Source: Open Heart. 2022 Dec 1;9(2):e002143. doi: 10.1136/openhrt-2022-002143 (PMC9723953; doi:10.1136/openhrt-2022-002143)
Supplement: Supplementary data [file openhrt-2022-002143supp001.pdf]

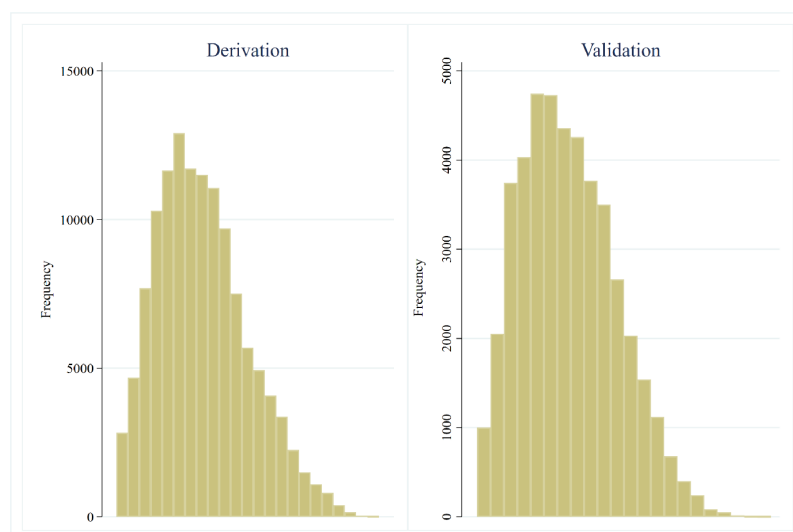

Figure 3. Histograms of the linear predictor

Table 3.

| Measure                   | Derivation data |       | Validation data |       |
|---------------------------|-----------------|-------|-----------------|-------|
|                           | Estimate        | se    | Estimate        | Se    |
| HR; Fairly good vs. good* | 2.78            | .217  | 2.55            | .376  |
| HR; Fairly bad vs. good*  | 10.45           | .772  | 7.47            | 1.047 |
| HR; Bad vs. good*         | 33.69           | 2.466 | 21.27           | 2.965 |

HR; hazard ratios

## Calculation of risk score

## Step 1. Cox proportional hazards regression log hazard coefficients

| Risk factor            | Coefficient, $B_i$ | Mean or proportion |
|------------------------|--------------------|--------------------|
| Age, years             | .07801             | 73.3               |
| Gender                 | .08949             | .64                |
| Diabetes               | .51539             | .22                |
| Smoker previous        | .03841             | .35                |
| Smoker current         | .38103             | .17                |
| Smoker non             | Base               | .48                |
| Statins not prescribed | .65660             | .13                |
| Heart failure          | .96994             | .14                |

## Step 2. Definition of a point

One point constitutes:

5 years aging multiplied by the coefficient for Age

From our model, we have  $B_i = .07801 * 5 = 0.39005$

## 3. Formula for points

| Categories      | Reference value( $W_{ij}$ ) | $B_i$          | Points $_{ij}=B_i(W_{ij}-W_{iREF})/B$ |
|-----------------|-----------------------------|----------------|---------------------------------------|
|                 |                             | .07801         |                                       |
| Age             | 55-59                       | 57= $W_{1REF}$ | 0                                     |
|                 | 60-64                       | 62             | 1                                     |
|                 | 65-69                       | 67             | 2                                     |
|                 | 70-74                       | 72             | 3                                     |
|                 | 75-79                       | 77             | 4                                     |
|                 | 80-84                       | 82             | 5                                     |
|                 | 85-89                       | 87             | 6                                     |
|                 | 90-94                       | 92             | 7                                     |
|                 | 95-105                      | 97             | 8                                     |
| Gender          | Female                      | 0= $W_{2REF}$  | .08949                                |
|                 | Male                        | 1              | 0                                     |
| Diabetes        | No                          | 0= $W_{3REF}$  | .51539                                |
|                 | Yes                         | 1              | 1                                     |
| Smoker previous | No                          | 0= $W_{4REF}$  | .03841                                |
|                 | Yes                         | 1              | 0                                     |
| Smoker current  | No                          | 0= $W_{4REF}$  | .38103                                |
|                 | Yes                         | 1              | 1                                     |
| Statins         | Prescribed                  | 0= $W_{5REF}$  | .65660                                |
|                 | Not prescribed              | 1              | 2                                     |
| Heart failure   | No                          | 0= $W_{6REF}$  | .96994                                |
|                 | Yes                         | 1              | 2                                     |

## 4. Point System

| Risk factor     | Categories     | Points |
|-----------------|----------------|--------|
| Age             | 55-59          | 0      |
|                 | 60-64          | 1      |
|                 | 65-69          | 2      |
|                 | 70-74          | 3      |
|                 | 75-79          | 4      |
|                 | 80-84          | 5      |
|                 | 85-89          | 6      |
|                 | 90-94          | 7      |
|                 | 95-105         | 8      |
| Gender          | Female         | 0      |
|                 | Male           | 0      |
| Diabetes        | No             | 0      |
|                 | Yes            | 1      |
| Smoker previous | No             | 0      |
|                 | Yes            | 0      |
| Smoker current  | No             | 0      |
|                 | Yes            | 1      |
| Statins         | Prescribed     | 0      |
|                 | Not prescribed | 2      |
| Heart failure   | No             | 0      |
|                 | Yes            | 2      |

## 5. Attach risk to every point

$$\sum_{i=1}^p B_i \bar{X}_i = .0780096*(73.3) + .0894894*(0.64) + .5153974*(0.23) + .0384073*(0.35) + .3810368*(0.17) + .6566036*(0.13) + .9699417*(0.14) = 6.1932874$$

$$\sum_{i=1}^p B_i X_i \approx \text{for every point}$$

$$.0780096*(57) + .390048*(0) = 4.4465472$$

$$.0780096*(57) + .390048*(1) = 4.8365952$$

$$.0780096*(57) + .390048*(2) = 5.2266432$$

$$.0780096*(57) + .390048*(3) = 5.6166912$$

$$.0780096*(57) + .390048*(4) = 6.0067392$$

$$.0780096*(57) + .390048*(5) = 6.3967872$$

$$.0780096*(57) + .390048*(6) = 6.7868352$$

$$.0780096*(57) + .390048*(7) = 7.1768832$$

$$.0780096*(57) + .390048*(8) = 7.5669312$$

$$.0780096*(57) + .390048*(9) = 7.9569792$$

$$.0780096*(57) + .390048*(10) = 8.3470272$$

$$.0780096*(57) + .390048*(11) = 8.7370752$$

$$.0780096*(57) + .390048*(12) = 9.1271232$$

$$.0780096*(57) + .390048*(13) = 9.5171712$$

$$.0780096*(57) + .390048*(14) = 9.9072192$$

$$S_o(t) = 0.9035 \text{ Survival at one-year}$$

5) Attach risk estimate to each point total risk= $1 - S_o(t)^{exp(\sum_{i=1}^p B_i X_i - \sum_{i=1}^p B_i \bar{X}_i)}$

| Points | Risks associated with point totals |
|--------|------------------------------------|
| 0      | 0.0176                             |
| 1      | 0.0259                             |
| 2      | 0.0380                             |
| 3      | 0.0557                             |
| 4      | 0.0812                             |
| 5      | 0.1176                             |
| 6      | 0.1687                             |
| 7      | 0.2389                             |
| 8      | 0.3318                             |
| 9      | 0.4488                             |
| 10     | 0.5851                             |
| 11     | 0.7273                             |
| 12     | 0.8533                             |
| 13     | 0.9412                             |
| 14     | 0.9848                             |
